# Supplementary material
Source: PubMed Central journal article supplement (PMC6051730)

**Figure 1e (top)**

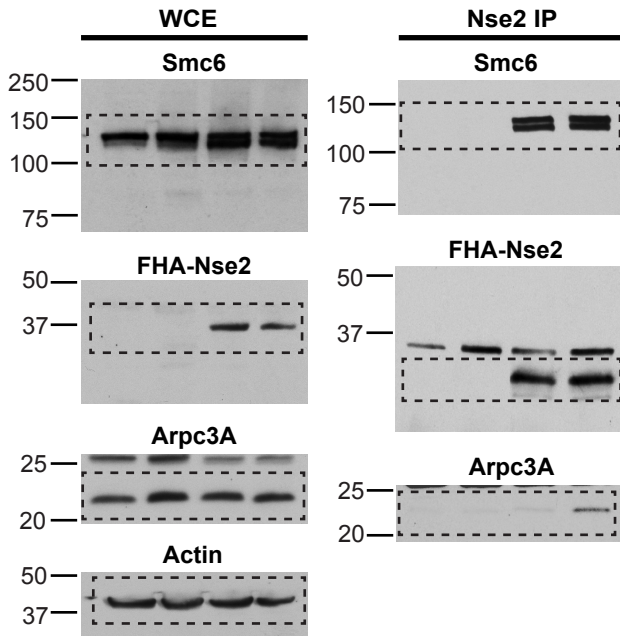

**Figure 1e (bottom)**

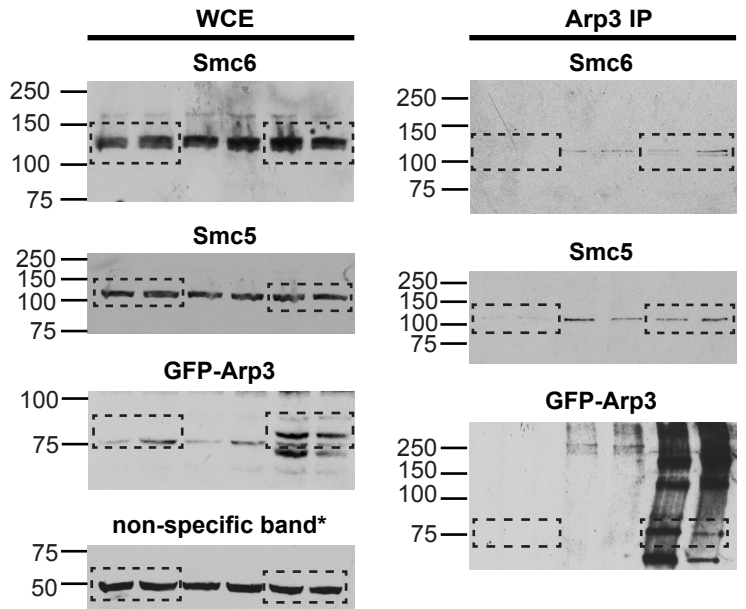

**Figure 3e and S6c (Top)**

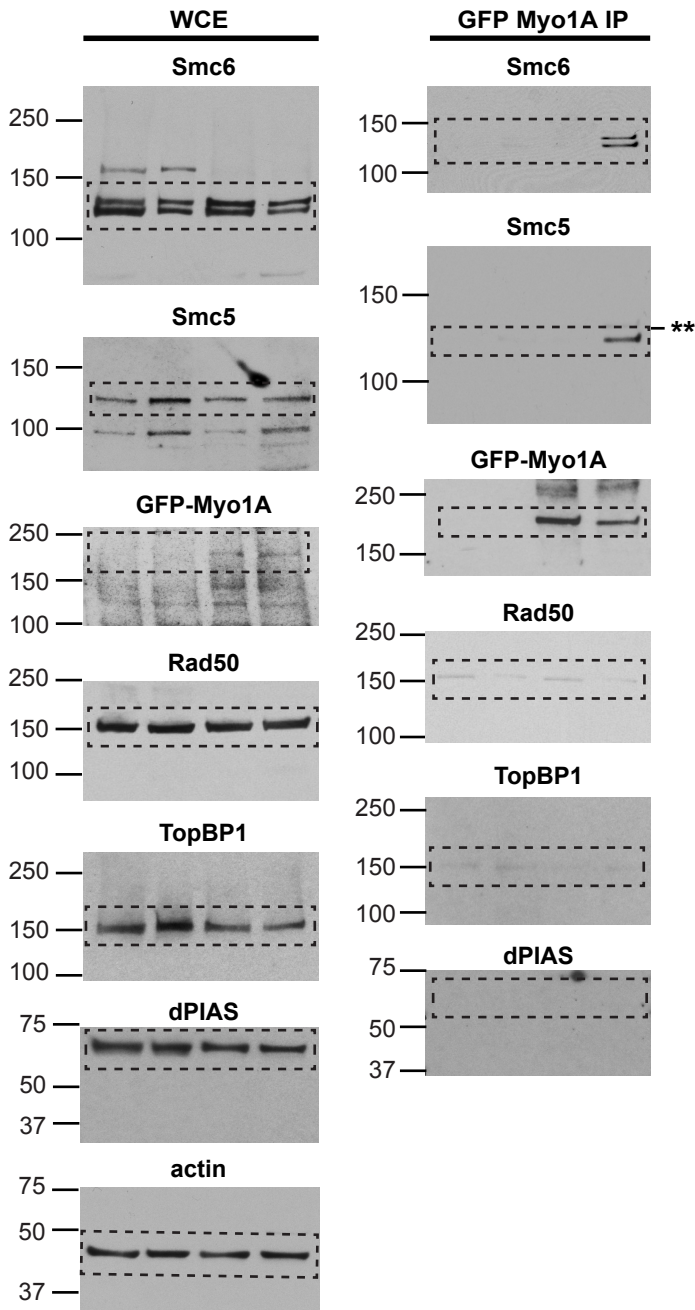

**Figure 3e and S6c (middle)**

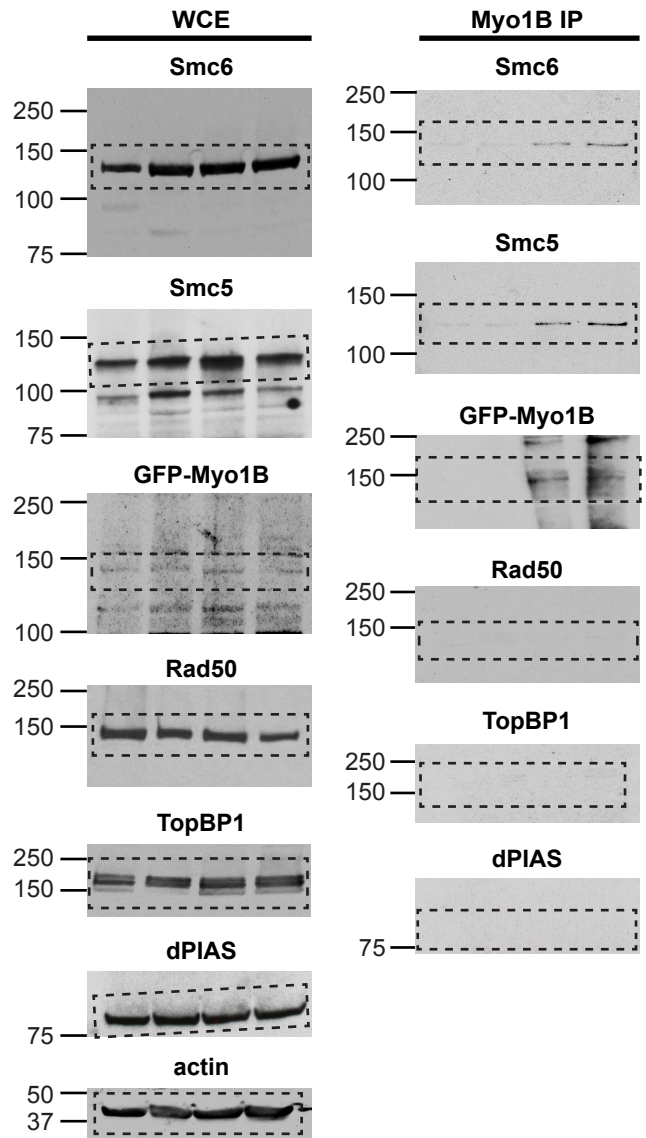

**Figure 3e and Extended Figure 6c (bottom)**

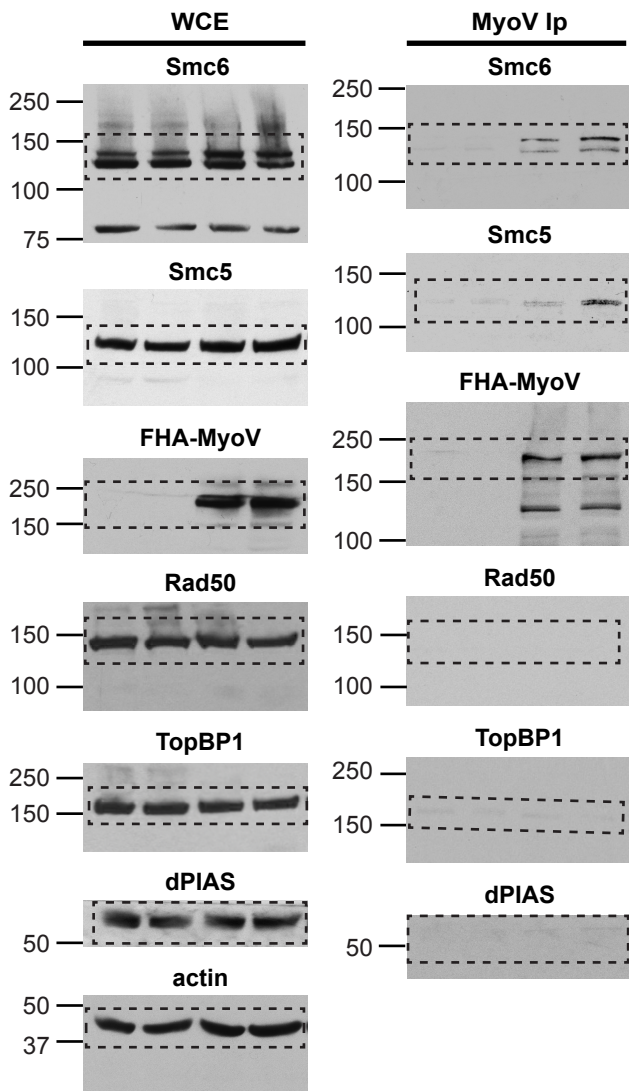

**Extended Figure 1b**

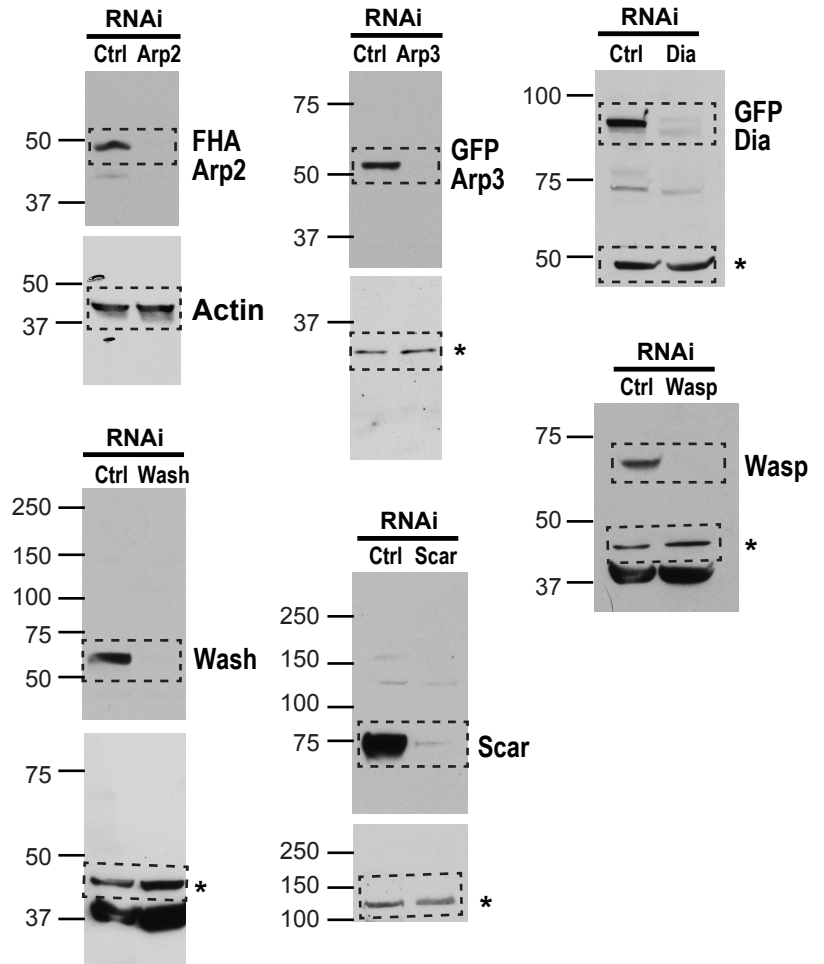

**Extended Figure 2h**

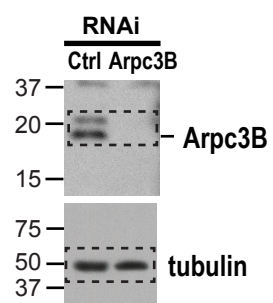

**Extended Figure 3a**

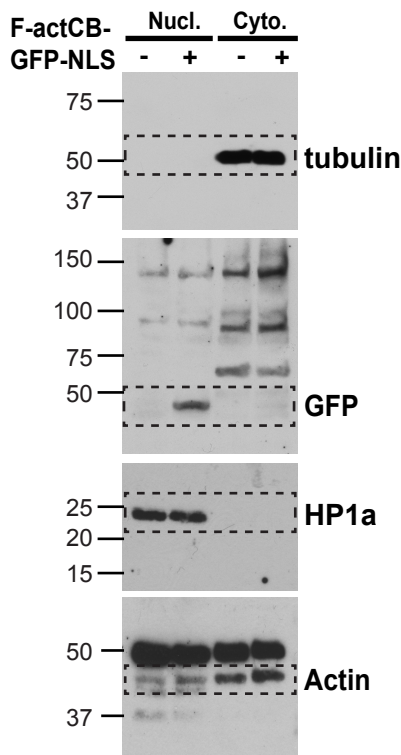

**Extended Figure 5a**

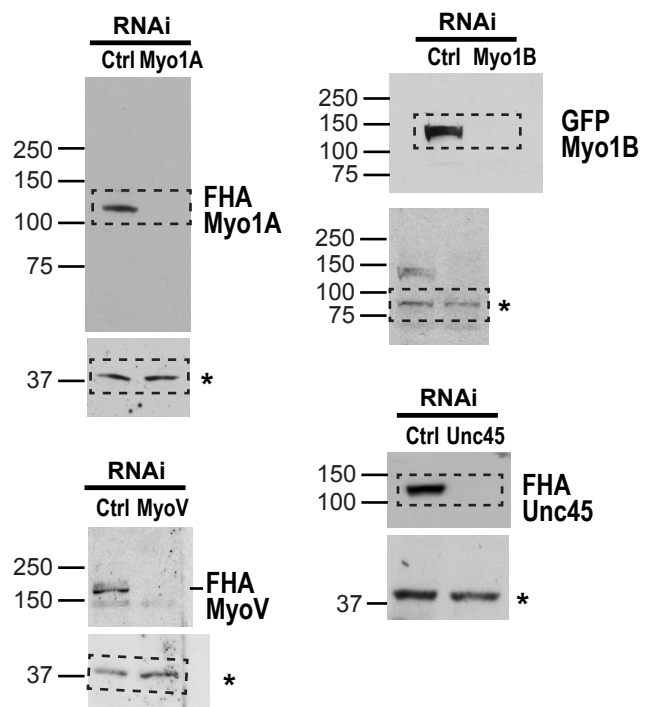

### Extended Figure 6b

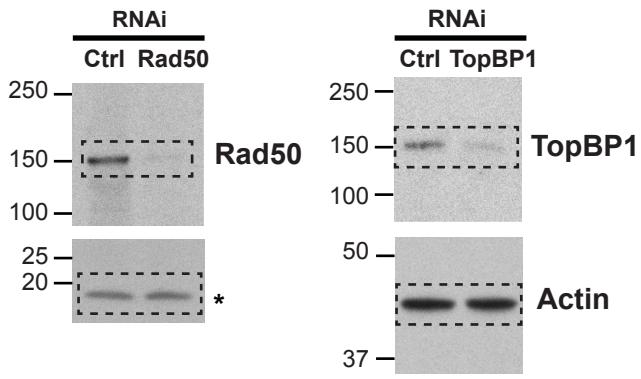

### Extended Figure 8a

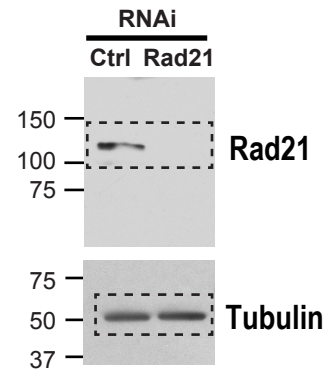

### Extended Figure 8h

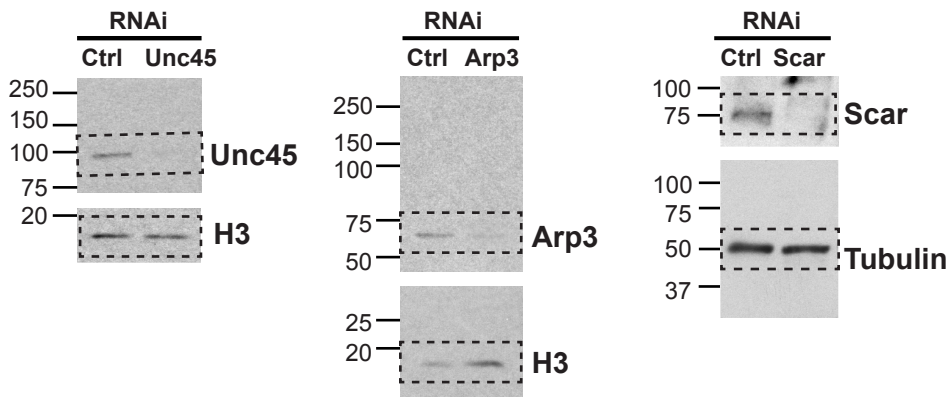

Supplement: NIHMS969301-supplement-1.pdf [file NIHMS969301-supplement-1.pdf]
